# Supplementary material
Source: PubMed Central journal article supplement (PMC7613259)
Supplement: EMS145992-supplement-Supplementary_information_5.pdf [file EMS145992-supplement-Supplementary_information_5.pdf]

## Supplementary information 5: Predictive Model of Collagen Homeostasis

### Reactions and Equations

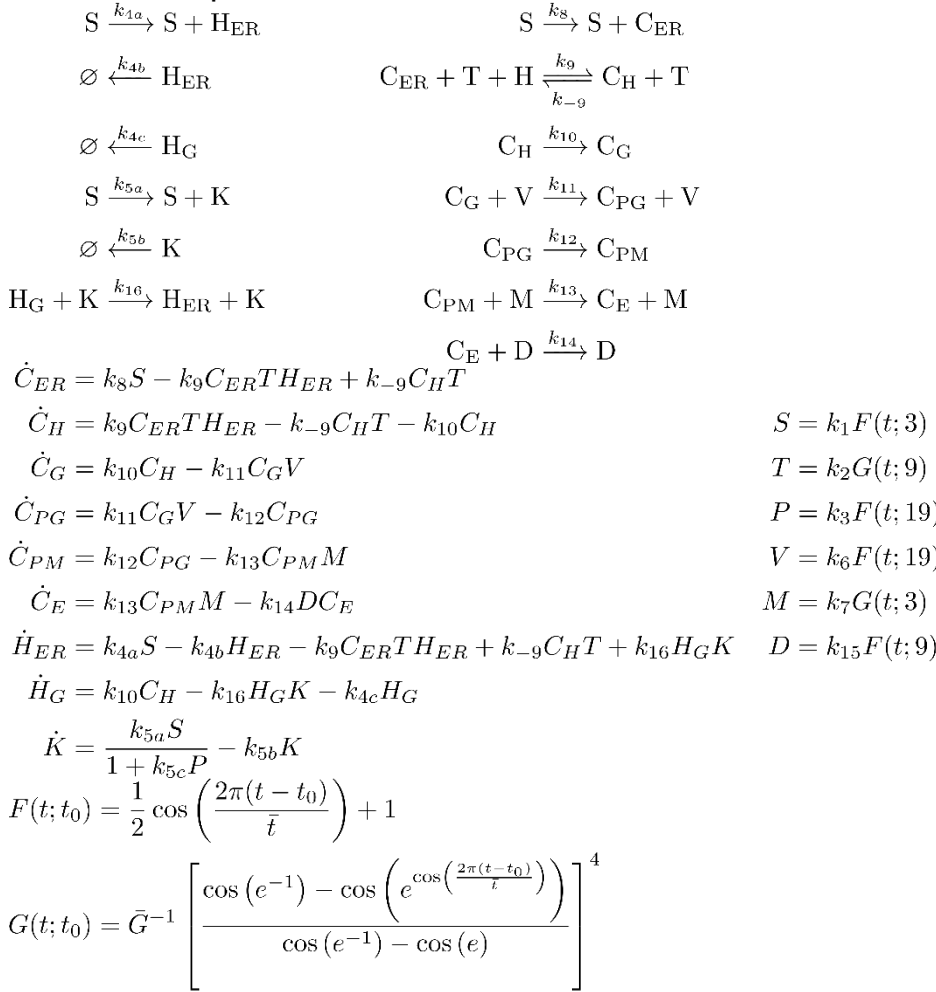

$t_0$  = phase (hours)

$\bar{G}$  = mean pulse function value determined by mean value theorem

### Variables

All variables are protein concentrations in units of  $\mu\text{M}$  relative to typical fibroblast cell size.

| Variable | Description                                 | Variable | Description |
|----------|---------------------------------------------|----------|-------------|
| $C_{ER}$ | ER located collagen                         | $S$      | SEC61A2     |
| $C_H$    | Collagen-HSP <sub>47</sub> complex in ERGIC | $T$      | TANGO1      |
| $C_G$    | Golgi located collagen                      | $P$      | PDE4D       |
| $C_{PG}$ | Post-Golgi compartments located collagen    | $V$      | VPS33B      |
| $C_{PM}$ | Plasma membrane located collagen            | $M$      | MMP14       |
| $C_E$    | Extracellular collagen                      | $D$      | CTSK        |
| $H_{ER}$ | ER located HSP <sub>47</sub>                |          |             |
| $H_G$    | Golgi located HSP <sub>47</sub>             |          |             |
| $K$      | Pka                                         |          |             |

## Parameters

Parameter values for the model were derived where possible from existing results in the literature (such as<sup>1</sup>). This paper lists protein copy numbers in molecules per cell, translation rates in molecules per mRNA per hour, mRNA copy numbers in molecules per cell, and protein half-life in hours, among others. These, along with a typical fibroblast cell size of 2.04 pL were combined to give translation rates in micro-molar per hour, and concentrations in micro-molar, or time scale rates in per hour. For example,  $k_1$  was calculated by dividing protein copy number by the cell size and Avogadro's number to give concentration. Where values for a particular protein were not available, translation rates were taken as the median values from<sup>1</sup>, as detailed below. The values for procollagen transport rates from one intracellular compartment to the next were guided by knowledge of the speed of vesicular transport in the eukaryotic cell.

| Parameter   | Value                                | Description                                                      | Source                                                                                                                                                       |
|-------------|--------------------------------------|------------------------------------------------------------------|--------------------------------------------------------------------------------------------------------------------------------------------------------------|
| $\mu_{typ}$ | 0.0342 $\mu\text{M}$                 | Median typical protein concentration                             | Median value calculated from <sup>1</sup>                                                                                                                    |
| $k_1$       | 0.00822 $\mu\text{M}$                | SEC61A2 mean protein concentration                               | Calculated directly from <sup>1</sup>                                                                                                                        |
| $k_2$       | 0.0105 $\mu\text{M}$                 | TANGO1 mean protein concentration                                | Calculated directly from <sup>1</sup>                                                                                                                        |
| $k_3$       | 0.0342 $\mu\text{M}$                 | PDE4D mean protein concentration                                 | Median value calculated from <sup>1</sup>                                                                                                                    |
| $k_6$       | 0.00335 $\mu\text{M}$                | VPS33B mean protein concentration                                | Calculated directly from <sup>1</sup>                                                                                                                        |
| $k_7$       | 0.00457 $\mu\text{M}$                | MMP14 mean protein concentration                                 | Calculated directly from <sup>1</sup>                                                                                                                        |
| $k_{15}$    | 0.0342 $\mu\text{M}$                 | CTSK mean protein concentration                                  | Median value calculated from <sup>1</sup>                                                                                                                    |
| $\bar{t}$   | 24 h                                 | Circadian period                                                 | Length of one circadian cycle                                                                                                                                |
| $k_{4a}$    | 4.84 $\text{h}^{-1}$                 | HSP47 protein synthesis rate                                     | Adjusted for physicality from values calculated directly from <sup>1</sup>                                                                                   |
| $k_{4b}$    | 0.00413 $\text{h}^{-1}$              | ER HSP47 protein degradation rate                                | Calculated directly from <sup>1</sup>                                                                                                                        |
| $k_{4c}$    | 0.00413 $\text{h}^{-1}$              | Golgi HSP47 protein degradation rate                             | Calculated directly from <sup>1</sup>                                                                                                                        |
| $k_{5a}$    | 1.89 $\text{h}^{-1}$                 | PKA protein synthesis rate                                       | Calculated directly from <sup>1</sup>                                                                                                                        |
| $k_{5b}$    | 0.00690 $\text{h}^{-1}$              | PKA protein degradation rate                                     | Calculated directly from <sup>1</sup>                                                                                                                        |
| $k_8$       | 0.0693 $\text{h}^{-1}$               | Col-I synthesis rate                                             | Adjusted for physicality from values calculated directly from <sup>1</sup>                                                                                   |
| $k_{10}$    | 3600 $\text{h}^{-1}$                 | ERGIC to Golgi Col-I transition rate                             | Estimated time scale (~1 second) of ERGIC vesicular transport calculated from typical cellular vesicle speeds and inter-compartmental distances <sup>2</sup> |
| $k_{12}$    | 0.0417 $\text{h}^{-1}$               | Post-Golgi compartments to plasma membrane Col-I transition rate | Estimated from dimensionally consistent powers of $\bar{t}$                                                                                                  |
| $k_{5c}$    | 29.2 $\mu\text{M}^{-1}$              | Rate constant for repression of PKA by PDE4D                     | Estimated from dimensionally consistent products of $\mu_{typ}$ and $\bar{t}$                                                                                |
| $k_{-9}$    | 1.22 $\mu\text{M}^{-1}\text{h}^{-1}$ | Col-I-HSP47 complex dissociation rate                            | Estimated from dimensionally consistent products of $\mu_{typ}$ and $\bar{t}$                                                                                |
| $k_{11}$    | 1.22 $\mu\text{M}^{-1}\text{h}^{-1}$ | Golgi to Post-Golgi compartments Col-I transition rate           | Estimated from dimensionally consistent products of $\mu_{typ}$ and $\bar{t}$                                                                                |

|          |                                       |                                                        |                                                                               |
|----------|---------------------------------------|--------------------------------------------------------|-------------------------------------------------------------------------------|
| $k_{13}$ | $12.2 \mu\text{M}^{-1}\text{h}^{-1}$  | Plasma membrane to extracellular Col-I transition rate | Estimated from dimensionally consistent products of $\mu_{typ}$ and $\bar{t}$ |
| $k_{14}$ | $1.22 \mu\text{M}^{-1}\text{h}^{-1}$  | CTSK dependent extracellular Col-I degradation rate    | Estimated from dimensionally consistent products of $\mu_{typ}$ and $\bar{t}$ |
| $k_{16}$ | $1.22 \mu\text{M}^{-1}\text{h}^{-1}$  | Golgi to ER HSP <sub>47</sub> transition rate          | Estimated from dimensionally consistent products of $\mu_{typ}$ and $\bar{t}$ |
| $k_9$    | $0.356 \mu\text{M}^{-2}\text{h}^{-1}$ | Col-I-HSP <sub>47</sub> complex association rate       | Estimated from dimensionally consistent products of $\mu_{typ}$ and $\bar{t}$ |

- 1 Schwanhauser, B. *et al.* Global quantification of mammalian gene expression control. *Nature* **473**, 337-342, doi:10.1038/nature10098 (2011).
- 2 Milo, R., Jorgensen, P., Moran, U., Weber, G. & Springer, M. BioNumbers--the database of key numbers in molecular and cell biology. *Nucleic Acids Res* **38**, D750-753, doi:10.1093/nar/gkp889 (2010).
