# Supplementary material
Source: PubMed Central journal article supplement (PMC7613259)
Supplement: EMS145992-supplement-Supplementary_table_1.pdf [file EMS145992-supplement-Supplementary_table_1.pdf]

## KEY RESOURCES TABLE

| REAGENT or RESOURCE                                  | SOURCE                              | IDENTIFIER                        |
|------------------------------------------------------|-------------------------------------|-----------------------------------|
| <b>Antibodies</b>                                    |                                     |                                   |
| anti-calnexin                                        | Abcam                               | Cat# ab75801; RRID: AB_1310022    |
| anti-cathepsin K                                     | Proteintech                         | Cat# 11239-1-AP; RRID: AB_2245581 |
| anti-collagen type I                                 | Gentaur                             | Cat# OARA02579; RRID: AB_10873334 |
| anti-COL1A1                                          | Santa Cruz                          | Cat# sc-8784; RRID: AB_638601     |
| anti-GAPDH (clone Gapdh71.1)                         | Merck                               | Cat# G8795; RRID: AB_1078991      |
| anti-GM130 (clone EP892Y)                            | Abcam                               | Cat# ab52649; RRID: AB_880266     |
| anti-GM130 (clone 35)                                | BD Biosciences                      | Cat# 610822; RRID: AB_398141      |
| anti-HSP47 (clone E-4)                               | Santa Cruz                          | Cat# sc-398579; RRID: N/A         |
| anti-PDE4D                                           | Santa Cruz                          | Cat# sc-25100; RRID: AB_2283587   |
| anti-PDIA2 (clone 1D3)                               | Abcam                               | Cat# ab190883; RRID: AB_2773043   |
| anti-Sec61alpha                                      | Santa Cruz                          | Cat# sc-12322; RRID: AB_2301616   |
| anti-TANGO1                                          | Santa Cruz                          | Cat# sc-366098; RRID: N/A         |
| anti-vinculin (clone V284 or VLN01)                  | Oncogene                            | Cat# CP64; RRID: AB_2214490       |
| anti-VPS33B (clone G-9)                              | Proteintech Europe                  | Cat# 12195-1-AP; RRID: AB_2215198 |
| anti-mouse FITC-conjugated                           | Abcam                               | Cat# ab6785; RRID: AB_955241      |
| anti-rabbit Cy5-conjugated                           | Thermo Fisher Scientific            | Cat# A10523; RRID: AB_2534032     |
| anti-goat HRP conjugated                             | Thermo Fisher Scientific            | Cat# PA1-28664; RRID: AB_10990162 |
| anti-mouse HRP-conjugated                            | Thermo Fisher Scientific            | Cat# 32430; RRID: AB_1185566      |
| anti-rabbit HRP-conjugated                           | Thermo Fisher Scientific            | Cat# 32460; RRID: AB_1185567      |
| <b>Chemicals, Peptides, and Recombinant Proteins</b> |                                     |                                   |
| Alt-R CRISPR-Cas9 tracrRNA                           | Integrated DNA Technologies         | Cat# 1072533                      |
| Alt-R CRISPR crRNA                                   | Integrated DNA Technologies         | Cat# CUSTOM                       |
| Alt-R S.p. Cas9 nuclease V3                          | Integrated DNA Technologies         | Cat# 1081058                      |
| collagenase type 4                                   | Worthington Biochemical Corporation | Cat# LS004182                     |
| dexamethasone                                        | Merck                               | Cat# D4902; CAS 50-02-2           |

|                                                        |                                  |                                  |
|--------------------------------------------------------|----------------------------------|----------------------------------|
| D-luciferin                                            | Merck                            | Cat# L9504; CAS 2591-17-5        |
| horse serum                                            | Thermo Fisher Scientific         | Cat# 26050088                    |
| L-[ <sup>14</sup> C(U)]-Proline                        | Perkin Elmer                     | Cat# NEC285E050UC                |
| Lipofectamin RNAiMAX                                   | Thermo Fisher Scientific         | Cat# 133778-075                  |
| Novex 6% Tris-Glycine Mini Gels                        | Thermo Fisher Scientific         | Cat# XP00065BOX                  |
| NuPAGE MOPS SDS Running Buffer                         | Thermo Fisher Scientific         | Cat# NP0001                      |
| NuPAGE Novex 10% polyacrylamide Bis-Tris gels          | Thermo Fisher Scientific         | Cat# NP0302BOX                   |
| Pierce ECL Western Blotting Substrate                  | Thermo Fisher Scientific         | Cat#32106                        |
| POROS R3 beads                                         | Applied Biosystems               | Cat#1-1339-03                    |
| odanacatib                                             | Cambridge Bioscience Ltd.        | Cat # 21466; CAS 603139-19-1     |
| RQ1 RNase-Free DNase                                   | Promega Corporation              | Cat# M6101                       |
| SensiFAST SYBR No-ROX Kit                              | Bioline                          | Cat# BIO-98005                   |
| Skimmed milk powder                                    | Merck                            | Cat# 1153630500, CAS 999999-99-4 |
| TaqMan Reverse Transcription Reagents                  | Thermo Fisher Scientific         | Cat# N8080234                    |
| TRIzol reagent                                         | Thermo Fisher Scientific         | Cat# 15596026                    |
| VECTASHIELD Hardset antifade mounting medium with DAPI | Vector Labs                      | Cat# H-1500                      |
| L-hydroxy-proline                                      | Applichem                        | A1705,0025                       |
| Chloramine T                                           | Sigma                            | 23270-50G                        |
| Sodium acetate trihydrate                              | Sigma                            | 71188-250G                       |
| Citric acid                                            | Sigma                            | C0759-100G                       |
| Glacial acetic acid                                    | Fisher Scientific                | A/0400/PB17                      |
| Sodium hydroxide                                       | Fisher Scientific                | S/4920/53                        |
| 4-dimethylamino-benzaldehyde                           | Sigma                            | 109762-100G                      |
| Perchloric acid                                        | BDH                              | 10175                            |
| N-propanol                                             | Sigma                            | 24135-2.5L-R                     |
| Hydrochloric acid                                      | Fisher Scientific                | H/1200/PB15                      |
| SR9009                                                 | Cayman Chemical, Ann Harbor, USA | Item number 11929                |
| KL001                                                  | Celbiochem                       | SML1032                          |
| <b>Critical Commercial Assays</b>                      |                                  |                                  |
| Mouse Embryonic Fibroblast Starter Nucleofector Kit    | Lonza                            | Cat# VPD-1006                    |
| Pierce BCA Protein Assay                               | Thermo Fisher Scientific         | Cat# 23227                       |
| P1 Primary Cell 4D-Nucleofector Kit                    | Lonza                            | Cat# V4XP-1024                   |
| SMART Digest Trypsin Kit                               | Thermo Fisher Scientific         | Cat#60109-101                    |
| <b>Deposited Data</b>                                  |                                  |                                  |

|                                                                                                                                                              |                                                 |                                                                |
|--------------------------------------------------------------------------------------------------------------------------------------------------------------|-------------------------------------------------|----------------------------------------------------------------|
| Mouse tail tendon time-series microarray                                                                                                                     | ArrayExpress<br>accession number<br>E-MTAB-7743 | Yeung et al., 2014;<br>PMID: 24897937                          |
| Mouse tail tendon time-series proteomics                                                                                                                     | This paper                                      |                                                                |
| Experimental Models: Organisms/Strains                                                                                                                       |                                                 |                                                                |
| Mouse: wild type, C57BL/6                                                                                                                                    | N/A                                             | N/A                                                            |
| Mouse: <i>Bmal1 lox/lox</i>                                                                                                                                  | The Jackson<br>Laboratory                       | Stock# 7668; Storch<br><i>et al.</i> , 2007; PMID:<br>17719549 |
| Mouse: <i>Clock<math>\Delta</math>19</i>                                                                                                                     | Laboratory of<br>Joseph Takahashi               | Vitaterna <i>et al.</i> ,<br>1994; PMID:<br>8171325            |
| Mouse: <i>PER2::LUC</i>                                                                                                                                      | Laboratory of<br>Joseph Takahashi               | Yoo <i>et al.</i> , 2004;<br>PMID: 14963227                    |
| Mouse: <i>Scx-Cre</i>                                                                                                                                        | Laboratory of<br>Ronen Schweitzer               | Blizt et al., 2009;<br>PMID: 20059955                          |
| Oligonucleotides                                                                                                                                             |                                                 |                                                                |
| Alt-R CRISPR crRNA for KO of <i>Sec61a1</i> , <i>Sec61a2</i> ,<br><i>Vps33b</i>                                                                              | This paper                                      |                                                                |
| GeneSolution siRNA for <i>Mia3</i>                                                                                                                           | Qiagen                                          | Cat# 1027416                                                   |
| SMARTpool ON-TARGET plus siRNA for <i>Pde4d</i>                                                                                                              | Dharmacon                                       | Cat# L-043744                                                  |
| qPCR primers for <i>Col1a1</i> , <i>Ctsk</i> , <i>Gapdh</i> , <i>Mia3</i> , <i>Nr1d1</i> ,<br><i>Pde4d</i> , <i>Sec61a1</i> , <i>Sec61a2</i> , <i>Vps33b</i> | This paper                                      |                                                                |
| Software and Algorithms                                                                                                                                      |                                                 |                                                                |
| False Discovery Rate filtering                                                                                                                               |                                                 | Bekker-Jensen et<br>al., 2017; PMID:<br>28601559               |
| MetaCycle                                                                                                                                                    |                                                 | Wu et al., 2016;<br>PMID: 27378304                             |
| Benjamini-Hochberg correction for false positives                                                                                                            |                                                 | Benjamin and<br>Hochberg, 1995                                 |
| Other                                                                                                                                                        |                                                 |                                                                |
| Screw top tubes 1.5 mL                                                                                                                                       | StarLab                                         | Cat# E1415-2231                                                |
